# Supplementary material for: Tracking Proliferative History in Lymphocyte Development with Cre-Mediated Sister Chromatid Recombination
Source: PubMed Central journal article supplement (PMC3814321; doi:10.1371/journal.pgen.1003887), 2013-10-31
Supplement: pgen.1003887.s002.pdf [file pgen.1003887.s002.pdf]

**A**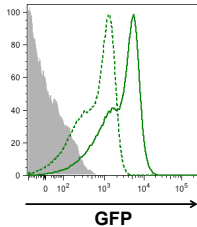

■ Tlox<sup>+</sup>Cre<sup>+</sup>  
■ Tlox<sup>+</sup>Cre<sup>-</sup>  
■ Tlox<sup>-</sup>Cre<sup>-</sup>

**B**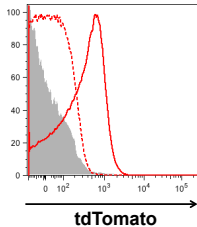

■ Tlox<sup>+</sup>Cre<sup>+</sup>  
■ Tlox<sup>+</sup>Cre<sup>-</sup>  
■ Tlox<sup>-</sup>Cre<sup>-</sup>
