# Supplementary material for: Tracking Proliferative History in Lymphocyte Development with Cre-Mediated Sister Chromatid Recombination
Source: PubMed Central journal article supplement (PMC3814321; doi:10.1371/journal.pgen.1003887), 2013-10-31

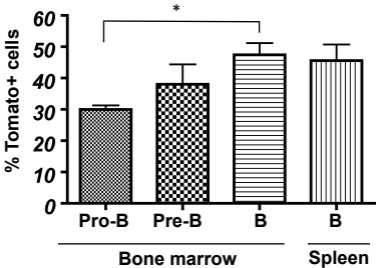

Supplement: pgen.1003887.s003.pdf [file pgen.1003887.s003.pdf]
